# Supplementary material for: Structural diversity of five new bitriazole-based complexes: luminescence, sorption, and magnetic properties
Source: Royal Society of Chemistry journal article supplement (doi:10.1039/c4dt03129f), 2014-11-05
Supplement: c4dt03129f1.pdf [file c4dt03129f1.pdf]

## *Supporting Information*

### **Structural diversity of five new bitriazole-based complexes: luminescence, sorption, and magnetic properties**

Li-Yun Du, Hui Wang, Ge Liu, Dong Xie, Fu-Sheng Guo, Lei Hou\* and Yao-Yu Wang

Key Laboratory of Synthetic and Natural Functional Molecule Chemistry of the Ministry of Education, Shaanxi Key Laboratory of Physico-Inorganic Chemistry, College of Chemistry & Materials Science, Northwest University, Xi'an 710069, P. R. China. Email: lhou2009@nwu.edu.cn

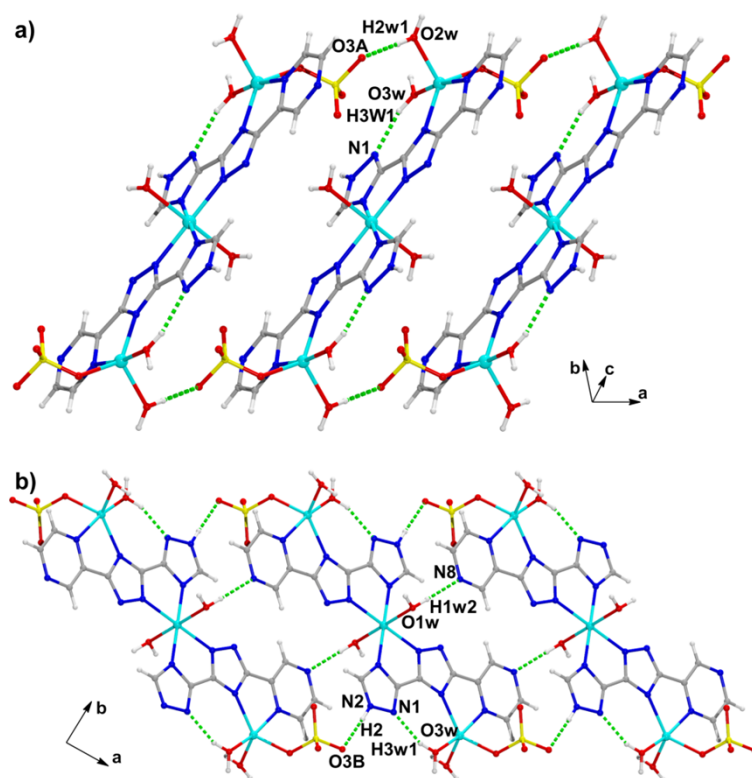

**Fig. S1** The intra- and inter-molecular intra- and inter-molecular O-H $\cdots$ O, O-H $\cdots$ N and N-H $\cdots$ O hydrogen-bonding interactions in **3**.

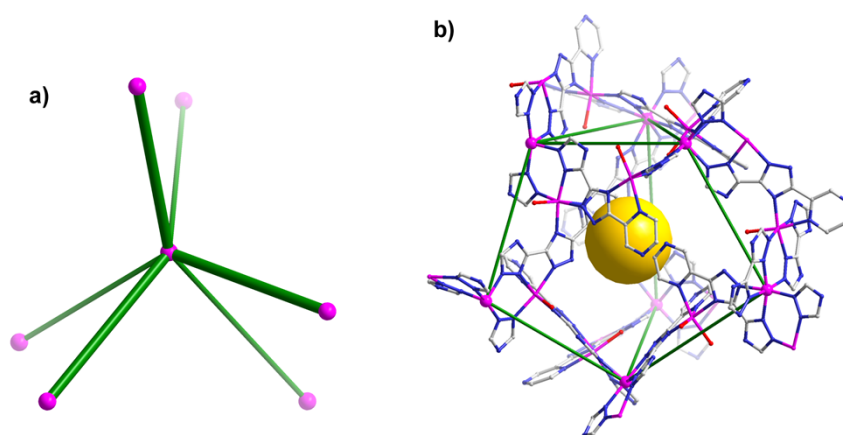

**Fig. S2** a) The 6-connected triangular prism node, and b) a cage formed by seven trinuclear nodes with one triangular face and three pentagonal faces in **5**.

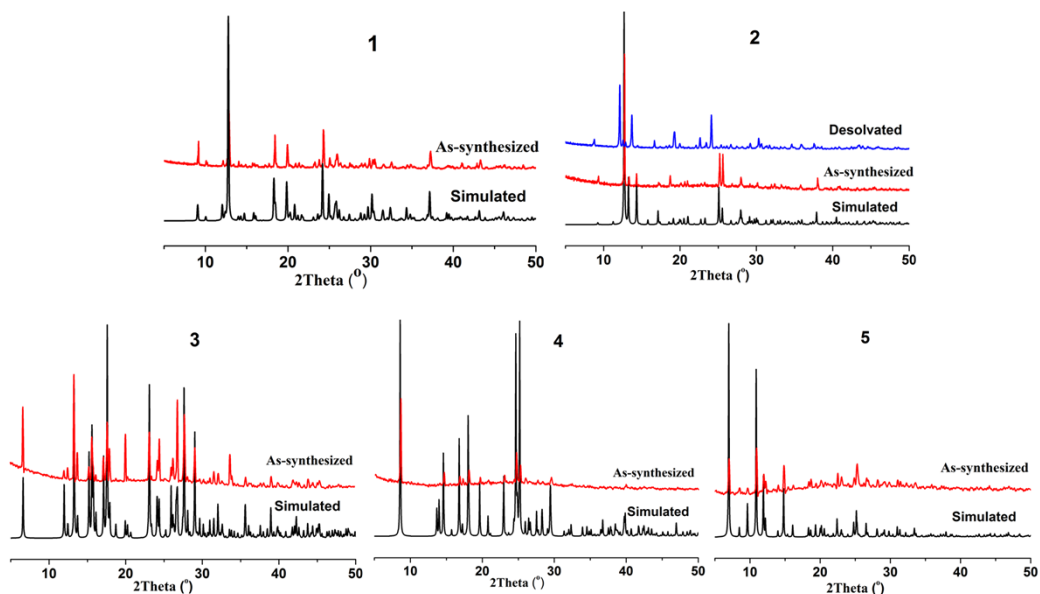

**Fig. S3** PXRD patterns of 1-5 simulated from the X-ray single-crystal structures and as-synthesized samples.

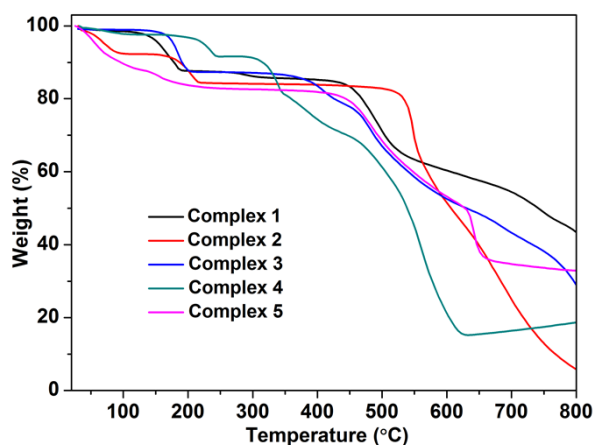

**Fig. S4** TGA plots of the synthesized samples of 1-5

### Calculation of sorption heat of 2 for CO<sub>2</sub> uptake using Virial 2 model.

$$\ln P = \ln N + 1/T \sum_{i=0}^m aiN^i + \sum_{i=0}^n biN^i \quad Q_{st} = -R \sum_{i=0}^m aiN^i$$

The above virial equation was used to fit the combined CO<sub>2</sub> isotherm data for **2** at 273 and 293 K, where  $P$  is the pressure,  $N$  is the adsorbed amount,  $T$  is the temperature,  $a_i$  and  $b_i$  are virial coefficients, and  $m$  and  $n$  are the number of coefficients used to describe the isotherms.  $Q_{st}$  is the coverage-dependent enthalpy of adsorption and  $R$  is the universal gas constant.

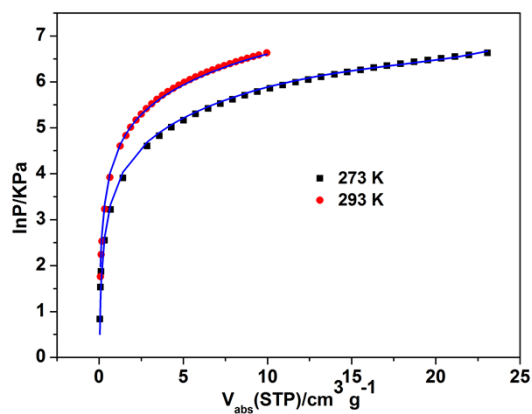

**Fig. S5** CO<sub>2</sub> adsorption isotherms of **2** with fitting by Virial 2 model. Fitting results:  $a_0 = -2869.12557$ ,  $a_1 = -19.77529$ ,  $a_2 = 2.85308$ ,  $a_3 = -0.1767$ ,  $a_4 = 0.00367$ ,  $b_0 = 14.278$ .  $\chi^2 = 0.00889$ ,  $R^2 = 0.99605$ .

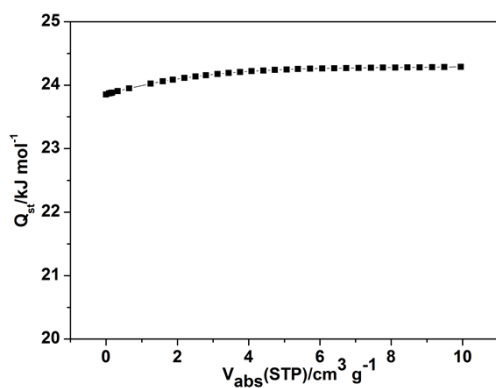

**Fig. S6** Heat of CO<sub>2</sub> adsorption for **2** estimated by the virial equation.

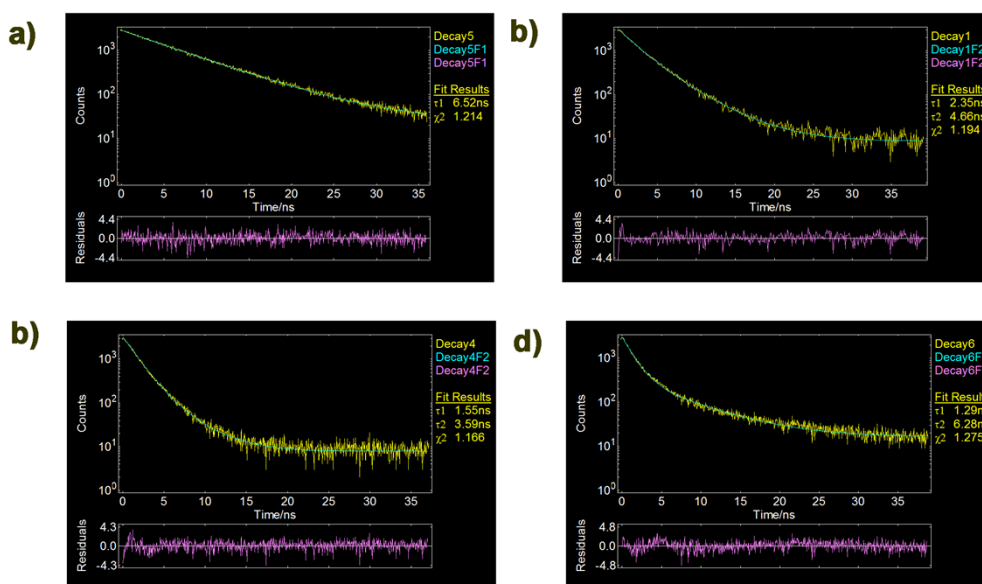

**Fig. S7** The luminescence decays of **1** a), **2** b), **3** c), H<sub>2</sub>pzbtz d) monitored at corresponding excitation/emission maxima.

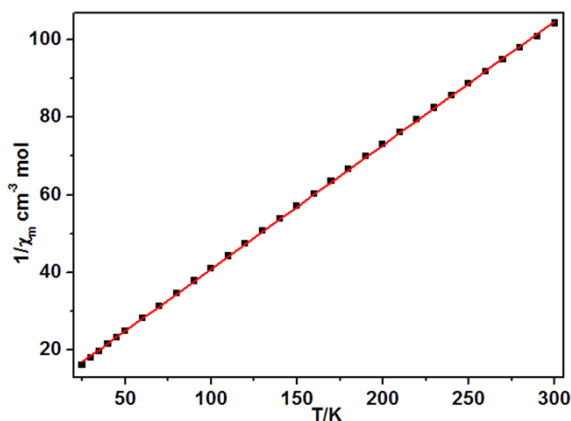

**Fig. S8** The temperature dependence of the reciprocal susceptibilities ( $\chi_M^{-1}$ ), red line corresponds to the best fit according to Curie-Weiss law.

**Table S1.** Selected bond lengths (Å) and bond angles (°) of complexes **1-5**.

| <b>1</b>            |            |                     |            |                     |            |
|---------------------|------------|---------------------|------------|---------------------|------------|
| Zn(1)-O(1)          | 2.0606(18) | Zn(1)-N(2)#1        | 2.078(2)   | Zn(1)-N(1)          | 2.122(2)   |
| Zn(1)-O(1W)         | 2.1463(19) | Zn(1)-N(8)#2        | 2.223(2)   | Zn(1)-N(4)          | 2.229(2)   |
| Zn(2)-O(2)          | 2.0261(19) | Zn(2)-O(2W)         | 2.0713(19) | Zn(2)-N(3)#3        | 2.090(2)   |
| Zn(2)-N(5)          | 2.129(2)   | Zn(2)-N(7)          | 2.249(2)   | N(2)#1-Zn(1)-N(1)   | 98.73(8)   |
| O(1)-Zn(1)-N(2)#1   | 88.74(8)   | O(1)-Zn(1)-N(1)     | 171.22(8)  | N(1)-Zn(1)-O(1W)    | 91.76(8)   |
| O(1)-Zn(1)-O(1W)    | 92.74(8)   | N(2)#1-Zn(1)-O(1W)  | 90.87(8)   | N(1)-Zn(1)-N(8)#2   | 87.88(8)   |
| O(1)-Zn(1)-N(8)#2   | 86.76(8)   | N(2)#1-Zn(1)-N(8)#2 | 95.91(8)   | N(2)#1-Zn(1)-N(4)   | 174.62(8)  |
| O(1W)-Zn(1)-N(8)#2  | 173.19(8)  | O(1)-Zn(1)-N(4)     | 96.62(8)   | N(8)#2-Zn(1)-N(4)   | 84.88(8)   |
| N(1)-Zn(1)-N(4)     | 75.96(8)   | O(1W)-Zn(1)-N(4)    | 88.43(8)   | O(2W)-Zn(2)-N(3)#3  | 97.62(8)   |
| O(2)-Zn(2)-O(2W)    | 87.97(8)   | O(2)-Zn(2)-N(3)#3   | 117.68(9)  | N(3)#3-Zn(2)-N(5)   | 99.46(8)   |
| O(2)-Zn(2)-N(5)     | 88.84(8)   | O(2W)-Zn(2)-N(5)    | 162.10(8)  | N(3)#3-Zn(2)-N(7)   | 91.77(8)   |
| O(2)-Zn(2)-N(7)     | 148.81(8)  | O(2W)-Zn(2)-N(7)    | 98.65(8)   | N(5)-Zn(2)-N(7)     | 75.54(8)   |
| <b>2</b>            |            |                     |            |                     |            |
| Cd(1)-N(2)#1        | 2.254(4)   | Cd(1)-N(6)#2        | 2.267(4)   | Cd(1)-N(4)          | 2.342(4)   |
| Cd(1)-N(3)          | 2.349(4)   | Cd(1)-N(8)#3        | 2.449(5)   | Cd(1)-N(7)#2        | 2.485(5)   |
| N(2)-Cd(1)#5        | 2.254(4)   | N(8)-Cd(1)#3        | 2.449(4)   | N(6)-Cd(1)#4        | 2.267(4)   |
| N(2)#1-Cd(1)-N(6)#2 | 111.58(15) | N(2)#1-Cd(1)-N(4)   | 93.12(16)  | N(6)#2-Cd(1)-N(4)   | 155.25(16) |
| N(2)#1-Cd(1)-N(3)   | 100.57(18) | N(6)#2-Cd(1)-N(3)   | 104.66(16) | N(4)-Cd(1)-N(3)     | 70.85(15)  |
| N(2)#1-Cd(1)-N(8)#3 | 88.53(18)  | N(6)#2-Cd(1)-N(8)#3 | 86.01(16)  | N(4)-Cd(1)-N(8)#3   | 93.32(15)  |
| N(3)-Cd(1)-N(8)#3   | 161.97(17) | N(2)#1-Cd(1)-N(7)#2 | 169.95(17) | N(6)#2-Cd(1)-N(7)#2 | 73.52(15)  |
| N(4)-Cd(1)-N(7)#2   | 81.83(15)  | N(3)-Cd(1)-N(7)#2   | 86.03(17)  | N(8)#3-Cd(1)-N(7)#2 | 83.13(17)  |
| <b>3</b>            |            |                     |            |                     |            |
| Zn(1)-N(4)#1        | 2.083(6)   | Zn(1)-N(4)          | 2.083(6)   | Zn(1)-N(3)#1        | 2.134(5)   |
| Zn(1)-N(3)          | 2.134(5)   | Zn(1)-O(1W)#1       | 2.245(5)   | Zn(1)-O(1W)         | 2.245(5)   |
| Zn(2)-O(1)          | 1.975(5)   | Zn(2)-O(2W)         | 2.015(5)   | Zn(2)-O(3W)         | 2.016(5)   |
| Zn(2)-N(6)          | 2.077(6)   | Zn(2)-N(7)          | 2.234(6)   | N(4)#1-Zn(1)-N(4)   | 180.0(3)   |
| N(4)#1-Zn(1)-N(3)#1 | 78.3(2)    | N(4)-Zn(1)-N(3)#1   | 101.7(2)   | N(4)#1-Zn(1)-N(3)   | 101.7(2)   |

|                    |          |                      |          |                      |          |
|--------------------|----------|----------------------|----------|----------------------|----------|
| N(4)-Zn(1)-N(3)    | 78.3(2)  | N(3)#1-Zn(1)-N(3)    | 180.0(4) | N(4)#1-Zn(1)-O(1W)#1 | 89.8(2)  |
| N(4)-Zn(1)-O(1W)#1 | 90.2(2)  | N(3)#1-Zn(1)-O(1W)#1 | 91.3(2)  | N(3)-Zn(1)-O(1W)#1   | 88.7(2)  |
| N(4)#1-Zn(1)-O(1W) | 90.2(2)  | N(4)-Zn(1)-O(1W)     | 89.8(2)  | N(3)#1-Zn(1)-O(1W)   | 88.7(2)  |
| N(3)-Zn(1)-O(1W)   | 91.3(2)  | O(1W)#1-Zn(1)-O(1W)  | 180.0(2) | O(1)-Zn(2)-O(2W)     | 102.7(2) |
| O(1)-Zn(2)-O(3W)   | 91.2(2)  | O(2W)-Zn(2)-O(3W)    | 94.1(2)  | O(1)-Zn(2)-N(6)      | 133.7(2) |
| O(2W)-Zn(2)-N(6)   | 122.6(2) | O(3W)-Zn(2)-N(6)     | 94.2(2)  | O(1)-Zn(2)-N(7)      | 93.2(2)  |
| O(2W)-Zn(2)-N(7)   | 92.4(2)  | O(3W)-Zn(2)-N(7)     | 171.2(2) | N(6)-Zn(2)-N(7)      | 77.3(2)  |

**4**

|                     |           |                      |            |                    |            |
|---------------------|-----------|----------------------|------------|--------------------|------------|
| Co(1)-O(1W)#1       | 2.083(3)  | Co(1)-O(1W)          | 2.083(3)   | Co(1)-N(7)#1       | 2.108(3)   |
| Co(1)-N(7)          | 2.108(3)  | Co(1)-N(5)           | 2.155(3)   | Co(1)-N(5)#1       | 2.155(3)   |
| O(1W)#1-Co(1)-O(1W) | 0.00(17)  | O(1W)#1-Co(1)-N(7)#1 | 90.41(12)  | O(1W)-Co(1)-N(7)#1 | 89.59(12)  |
| O(1W)#1-Co(1)-N(7)  | 89.59(12) | O(1W)-Co(1)-N(7)     | 90.41(12)  | N(7)#1-Co(1)-N(7)  | 180.000(1) |
| O(1W)#1-Co(1)-N(5)  | 90.76(12) | O(1W)-Co(1)-N(5)     | 89.24(12)  | N(7)#1-Co(1)-N(5)  | 101.84(12) |
| N(7)-Co(1)-N(5)     | 78.16(12) | O(1W)#1-Co(1)-N(5)#1 | 89.24(12)  | O(1W)-Co(1)-N(5)#1 | 90.76(12)  |
| N(7)#1-Co(1)-N(5)#1 | 78.16(12) | N(7)-Co(1)-N(5)#1    | 101.84(12) | N(5)-Co(1)-N(5)#1  | 180.000(1) |

**5**

|                       |            |                         |            |                        |            |
|-----------------------|------------|-------------------------|------------|------------------------|------------|
| Co(2)- N(2)#1         | 2.078(3)   | Co(2)- N(2)             | 2.078(3)   | Co(2)- N(9)#1          | 2.127(3)   |
| Co(2)-N(9)            | 2.127(3)   | Co(2)-N(12)             | 2.145(3)   | Co(2)-N(12)#1          | 2.145(3)   |
| Co(1)-N(10)#2         | 2.072(3)   | Co(1)-N(6)              | 2.093(3)   | Co(1)-O(1W)            | 2.114(3)   |
| Co(1)-N(1)#3          | 2.122(3)   | Co(1)-N(4)#3            | 2.139(3)   | Co(1)-N(7)             | 2.225(3)   |
| Co(3)-O(2W)#4         | 2.087(3)   | Co(3)-O(2W)             | 2.087(3)   | Co(3)-N(14)            | 2.104(3)   |
| Co(3)- N(14)#1        | 2.104(3)   | Co(3)-N(15)             | 2.200(3)   | Co(3)- N(15)#4         | 2.200(3)   |
| N(4)-Co(1)#5          | 2.139(3)   | N(1)-Co(1)#5            | 2.122(3)   | N(10)-Co(1)#6          | 2.072(3)   |
| N(2) #1-Co(2)-N(2)    | 90.84(16)  | N(2) #1-Co(2)-N(9) #1   | 92.66(10)  | N(2) -Co(2)-N(9) #1    | 96.83(10)  |
| N(2) #1-Co(2)-N(9)    | 96.83(10)  | N(2)-Co(2)-N(9)         | 92.66(10)  | N(9) #1-Co(2)-N(9)     | 166.47(14) |
| N(2) -Co(2)-N(12)     | 88.83(11)  | N(12)#1-Co(2)-N(2)      | 173.57(10) | N(9) #1-Co(2)-N(12) #1 | 76.77(10)  |
| N(12)#1-Co(2)-N(9)    | 93.75(10)  | N(12)-Co(2)-N(2)#1      | 173.57(10) | N(2)#1-Co(2)-N(12)#1   | 88.83(11)  |
| N(12)-Co(2)-N(9)#1    | 93.75(10)  | N(9)-Co(2)-N(12)        | 76.77(10)  | N(12)-Co(2)-N(12)#1    | 92.19(16)  |
| N(10)#2-Co(1)-N(6)    | 92.84(11)  | N(10)#2-Co(1)-O(1W)     | 92.92(12)  | N(6)-Co(1)-O(1W)       | 96.35(10)  |
| N(10)#2-Co(1)-N(1)#3  | 96.57(10)  | N(6)-Co(1)-N(1)#3       | 168.68(10) | O(1W)-Co(1)-N(1)#3     | 89.47(10)  |
| N(10)#2-Co(1)-N(4)#3  | 171.57(12) | N(6)-Co(1)-N(4)#3       | 92.77(10)  | O(1W)-Co(1)-N(4)#3     | 92.71(11)  |
| N(10)#3-Co(1)-N(7)#3  | 77.21(10)  | N(10)#2-Co(1)-N(7)      | 93.05(12)  | N(6)-Co(1)-N(7)        | 77.18(10)  |
| O(1W)-Co(1)-N(7)      | 171.40(11) | N(1)#3-Co(1)-N(7)       | 95.99(11)  | N(4)#3-Co(1)-N(7)      | 82.07(11)  |
| O(2W)#4-Co(3)-O(2W)   | 96.4(2)    | O(2W)#4-Co(3)-N(14)     | 87.54(11)  | O(2W)-Co(3)-N(14)      | 93.58(11)  |
| O(2W)#4-Co(3)-N(14)#4 | 93.58(11)  | O(2W)-Co(3)-N(14) #4    | 87.54(11)  | N(14)#4-Co(3)-N(14)    | 178.33(16) |
| O(2W)#4-Co(3)-N(15)   | 92.08(14)  | O(2W)-Co(3)-N(15)       | 166.65(14) | N(14)-Co(3)-N(15)      | 76.50(12)  |
| N(15)-Co(3)-N(14)#4   | 102.20(11) | O(2W)#4-Co(3)-N(15) #4  | 166.66(14) | O(2W)-Co(3)-N(15) #4   | 166.66(13) |
| N(15)#4-Co(3)-N(14)   | 102.20(11) | N(14) #4-Co(3)-N(15) #4 | 76.50(12)  | N(15)#4-Co(3)-N(15)    | 81.50(18)  |
| N(3)-N(4)-Co(1)#5     | 138.1(2)   | N(2)-N(1)-Co(1)#5       | 139.6(2)   | N(9)-N(10)-Co(1)#6     | 121.25(19) |

Symmetry codes for 1: #1 -x+2, -y+2, -z+1; #2 -x+1, y+1/2, -z+1/2; #3 x, -y+3/2, z-1/2; #4 x, -y+3/2, z+1/2; #5 -x+1, y-1/2, -z+1/2. For 2: #1 -x, y-1/2, -z+1/2; #2 x, -y+1/2, z-1/2; #3 -x+1, -y, -z+1; #4 x, -y+1/2, z+1/2; #5 -x, y+1/2, -z+1/2. For 3: #1 -x, -y, -z. For 4: #1 -x+3/2, -y+5/2, -z+1. For 5: #1 y, x, -z; #2 x-1/2, -y+3/2, -z+1/4; #3 y-1/2, -x+3/2, z+1/4; #4 -y+2, -x+2, -z+1/2; #5 -y+3/2, x+1/2, z-1/4; #6 x+1/2, -y+3/2, -z+1/4.

Table S2. The hydrogen bond parameters in complexes **3** and **4**.

| D-H...A             | D-H (Å) | H...A<br>(Å) | D...A<br>(Å) | <D-H...A<br>(°) |
|---------------------|---------|--------------|--------------|-----------------|
| <b>3</b>            |         |              |              |                 |
| O3W-H3W1...N1       | 0.85    | 1.93         | 2.753(9)     | 162             |
| O3W-<br>H3W2...O1#1 | 0.85    | 2.59         | 3.170(9)     | 126             |
| O3W-<br>H3W2...O3#1 | 0.85    | 1.92         | 2.726(8)     | 157             |
| N2-H2...O3#2        | 0.86    | 1.88         | 2.726(7)     | 170             |
| O1W-<br>H1W1...O4#3 | 0.85    | 2.00         | 2.805(7)     | 157             |
| O1W-<br>H1W2...N8#2 | 0.85    | 2.00         | 2.852(10)    | 176             |
| O2W-<br>H2W2...O2#4 | 0.85    | 1.84         | 2.691(8)     | 180             |
| O2W-<br>H2W1...O3#3 | 0.85    | 1.90         | 2.745(11)    | 180             |
| C6-H6...O2W#5       | 0.93    | 2.59         | 3.377(11)    | 143             |
| <b>4</b>            |         |              |              |                 |
| O1W-<br>H1W1...N6#6 | 0.85    | 2.04         | 2.868(4)     | 164             |
| N2-H2...N4#7        | 0.86    | 2.34         | 3.183(5)     | 164             |
| O1W-<br>H1W2...N3#8 | 0.85    | 2.28         | 3.100(5)     | 162             |
| C1-H1...N8#9        | 0.93    | 2.33         | 3.117(6)     | 142             |

Symmetry codes: #1 x, -1/2-y, -1/2+z; #2 x, y, -1+z; #3 1+x, y, z; #4 1+x, -1/2-y, 1/2+z; #5 x, -1/2-y, 1/2+z; #6 1/2+x, 1/2+y, z; #7 3/2-x, -1/2+y, 3/2-z; #8 3/2-x, 1/2-y, 1-z; #9 1-x, -y, 1-z.
